# Supplementary material
Source: publisher figshare collection journal article supplement (https://karger.figshare.com/ndownloader/files/27909324)
Supplement: Supplementary file 1 [file 27909324]

| **a) Models for Metabolic Parameters Original Post Hoc** | | | | | | | |
| --- | --- | --- | --- | --- | --- | --- | --- |
| Outcome | Parameter |  | | t-value | p-value | t-value | p-value |
| BODI 2 | Matsuda Index |  | | 2.592 | 0.0146 | 2.818 | 0.0085 |
| Stress (Family) |  | | 2.709 | 0.0107 | 2.927 | 0.0063 |
| Stress (Work) |  | | 2.569 | 0.0152 | 2.536 | 0.0165 |
| Compulsion (BSI) | HOMA-IR  x  BMI |  | | 2.612 | 0.0133 |  | n.s. |
| Paranoia (BSI) |  | | 2.462 | 0.0189 | 2.226 | 0.0325 |
| Global Score (BSI) |  | | 2.157 | 0.0379 | 2.272 | 0.0294 |
| Female Self-Identification | BMI |  | | 3.729 | 0.0007 | 3.317 | 0.0021 |
| BODI 2 | OGIS x BMI |  | | -2.405 | 0.0236 | -2.800 | 0.0095 |
| Female Self-Identification | FLI |  | | 3.451 | 0.0013 | no extreme values | |
| **b) Models for Anthropometric Parameters** **Original Post Hoc** | | | | | | | |
| Outcome | Parameter |  | | t-value | p-value | t-value | p-value |
| BODI 2 | Body Fat |  | | -2.174 | 0.0402 | -2.074 | 0.0490 |
| Female Self-Identification |  | | 2.865 | 0.0078 | 2.751 | 0.0103 |
| Neutral Self-Identification |  | | 2.114 | 0.0436 |  | n.s. |
| BODI 2 | Lean Mass |  | | 2.829 | 0.0095 | 3.063 | 0.0054 |
| Somatization (BSI) | Lean Mass  x  Gender Role |  | | -2.948 | 0.0068 | -2.363 | 0.0262 |
| Anxiety (BSI) | Body Fat  x  Gender Role |  | | -2.296 | 0.0299 | -2.251 | 0.0330 |
| PSS | WHR |  | | 2.319 | 0.0297 | 2.253 | 0.0341 |
| Interpersonal Sensitivity (BSI) |  | | 2.125 | 0.04 | 2.171 | 0.0360 |
| **c) Models for Hormone Parameters Original Post Hoc** | | | | | | | |
| Outcome | Parameter | | t-value | | p-value | t-value | p-value |
| BODI 2 | TSH  x  Gender Role | | -2.344 | | 0.0257 | -2.438 | 0.0207 |
| BODI 4 | -2.481 | | 0.0187 | -2.301 | 0.0283 |
| Stress (Self.-Orient.) | -2.112 | | 0.0424 |  | n.s. |
| Aggression (BSI) | LH | | -2.139 | | 0.0389 | -2.183 | 0.0353 |
| Aggression (BSI) | FSH | | 2.234 | | 0.0314 | 2.276 | 0.0286 |
| Male Self-Identification | LH x FSH | | -2.231 | | 0.0317 | no extreme values | |
| Stress  (Family Life) | Prolactin  x  Gender Role | | 2.301 | | 0.0352 | no extreme values | |
| Global Score (BSI) | Estradiol | | -2.629 | | 0.0122 | -2.763 | 0.0087 |
| Aggression (BSI) | -3.342 | | 0.0018 | -3.439 | 0.0014 |
| Anxiety (BSI) | -2.273 | | 0.0286 | -2.062 | 0.0459 |
| Interpersonal Sens. (BSI) | -2.302 | | 0.0268 | -2.422 | 0.0202 |
| **d) Models for Immuno-Inflammatory Paraemeters Original Post Hoc** | | | | | | | |
| Outcome | Parameter | | t-value | | p-value | t-value | p-value |
| BODI 2 | Cortisol (Sp.)  x  Gender Role | | 2.487 | | .0181 | 2.052 | 0.04817 |
| Paranoia (BSI) | Cortisol (Sr.) | | 2.487 | | 0.0172 | no extreme values | |
| Female Self-Identification | CRP | | 2.576 | | 0.0137 | no extreme values | |
| **e) Models for Biofeedback Parameters Original Post Hoc** | | | | | | | |
| Outcome | Parameter | | t-value | | p-value | t-value | p-value |
| BODI 2 | Baseline HRV  x  Stress HRV | | 2.399 | | 0.0227 |  | n.s. |
| BODI 4 | 2.868 | | 0.0074 |  | n.s. |
| Stress (Work Life) | 2.071 | | 0.0465 |  | n.s. |
| Psychoticism (BSI) | -2.870 | | 0.0067 | -2.935 | 0.0057 |
| Stress (Family Life) | Stress HRV | | -2.676 | | 0.0114 |  | n.s. |

**Supplementary Table 1.** Generalized linear models results, before and after capping of extreme values. All values grater than 1.5 times the interquartile distance were reduced to the value of the 90th percentile of the distribution of the respective parameter. Significant results of the original models are put next to the results of the post hoc models. Interaction effects are indicated by “x”.

**
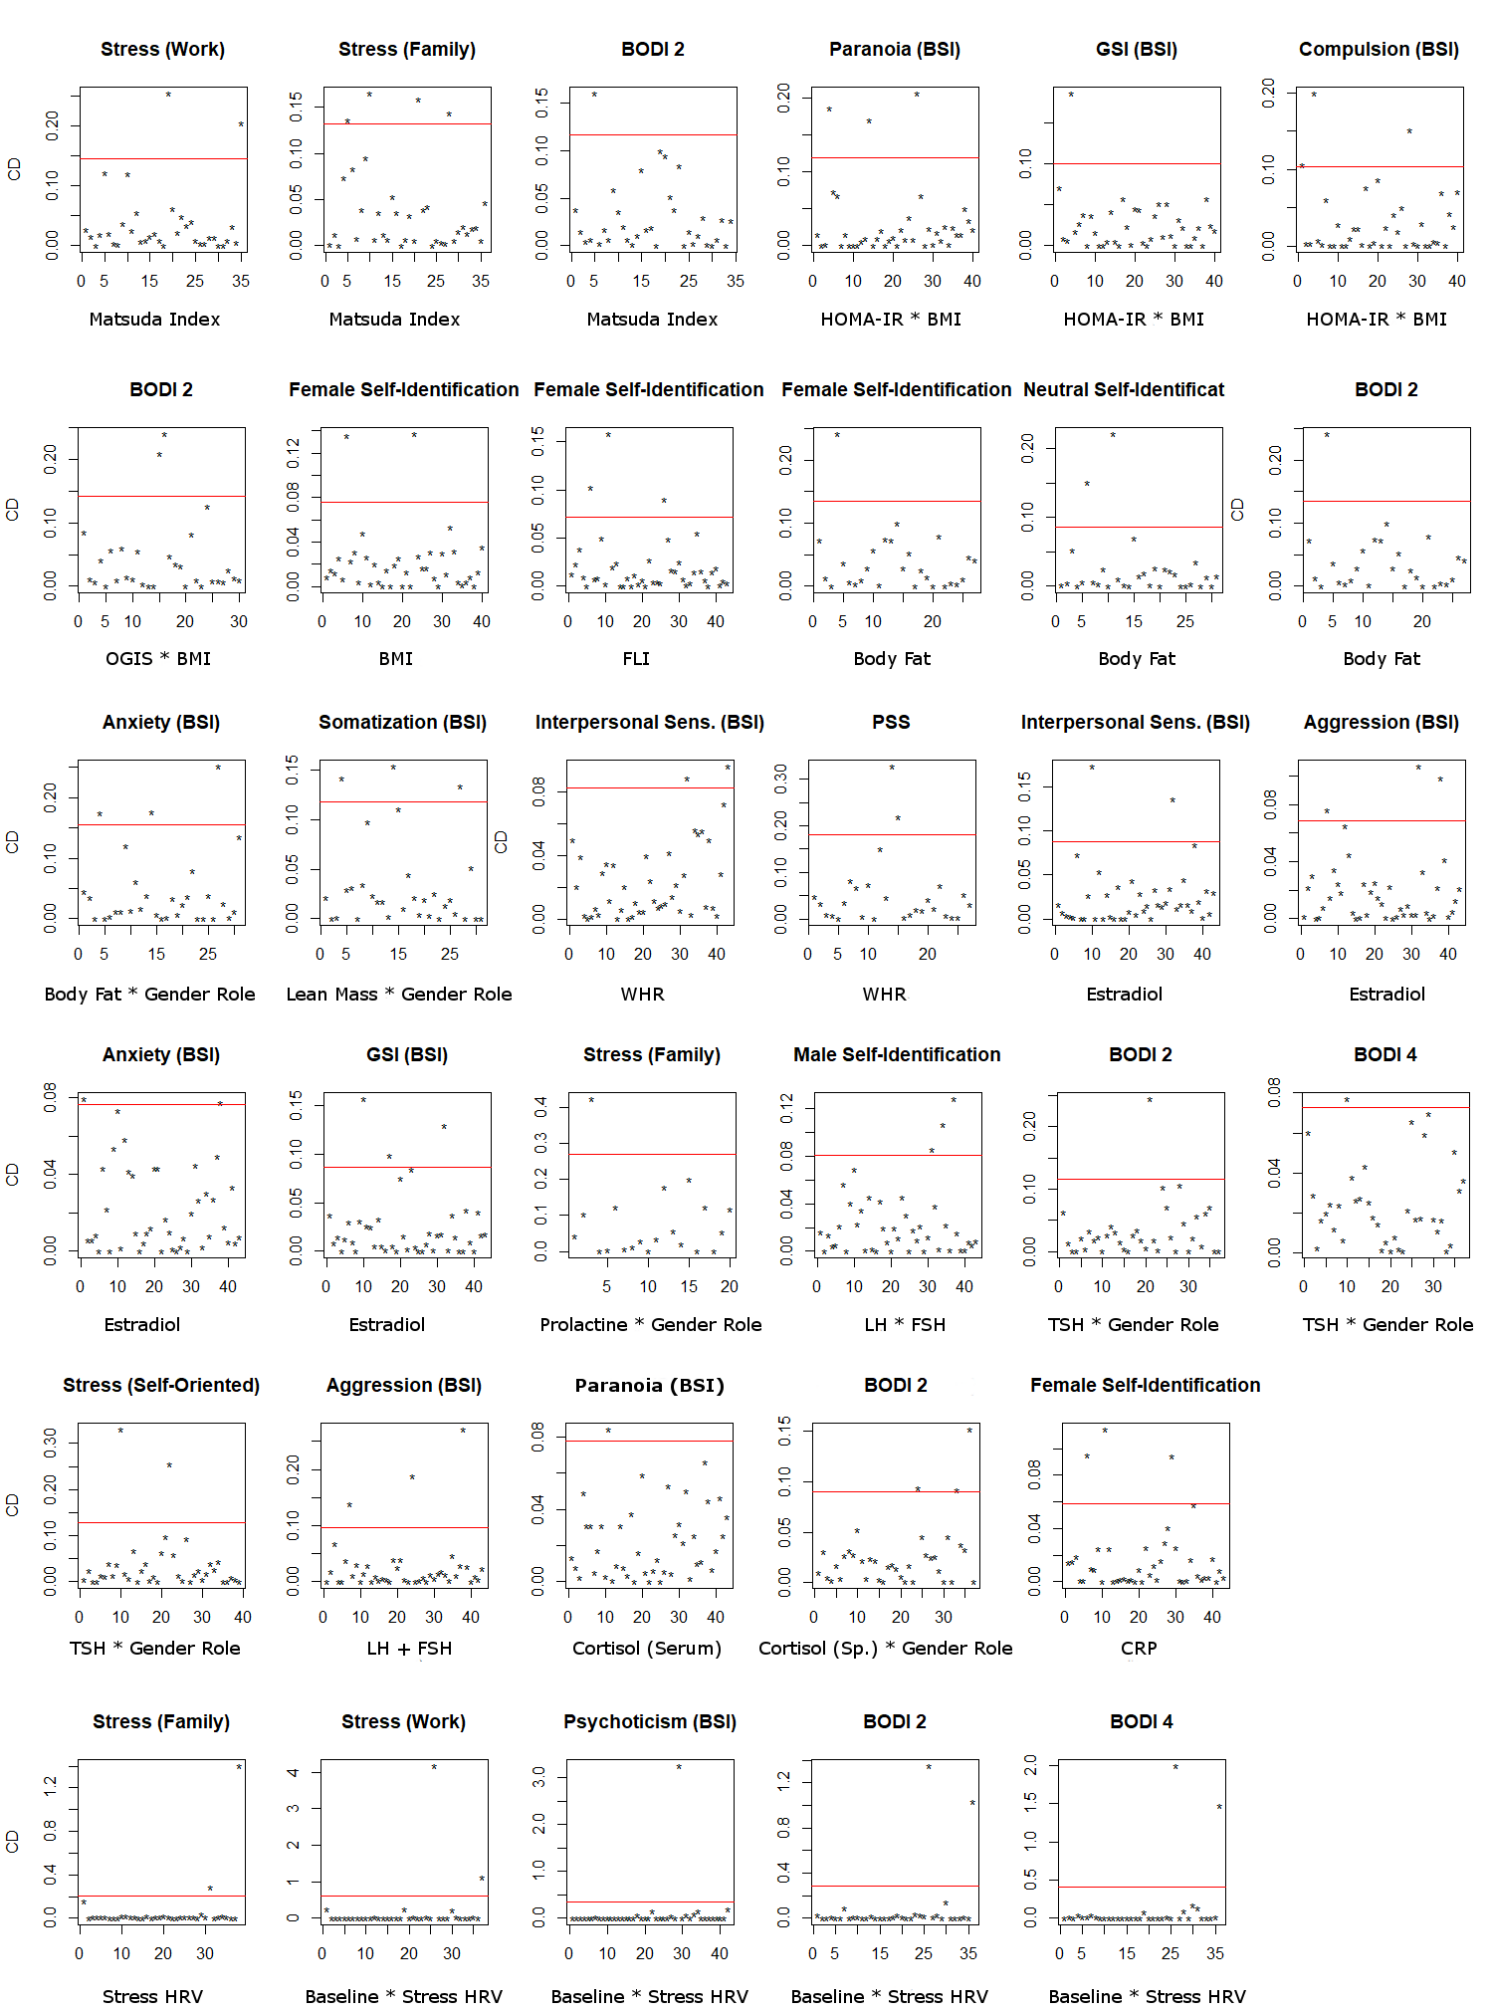
**

**Supplementary Figure 1.** Plots of the influence of each observation on the fit of the regression model, according to Cook´s distance (CD, measured on the y-axis). Observations are listed on the x-axis and each dot corresponds to one patient. Headlines indicate the model outcome parameter, the lines below each plot indiciate the significant predictor variables of the respective model. The red line indicates the threshold of three times the mean of the CD, used for detection of especially infleuntial observations that are to be checked for extreme values.
